# Supplementary material for: Telomeric RNAs are essential to maintain telomeres
Source: PubMed Central journal article supplement (PMC4992061; doi:10.1038/ncomms12534), 2016-08-17
Supplement: ncomms12534-s1.pdf [file ncomms12534-s1.pdf]

Supplementary Figures

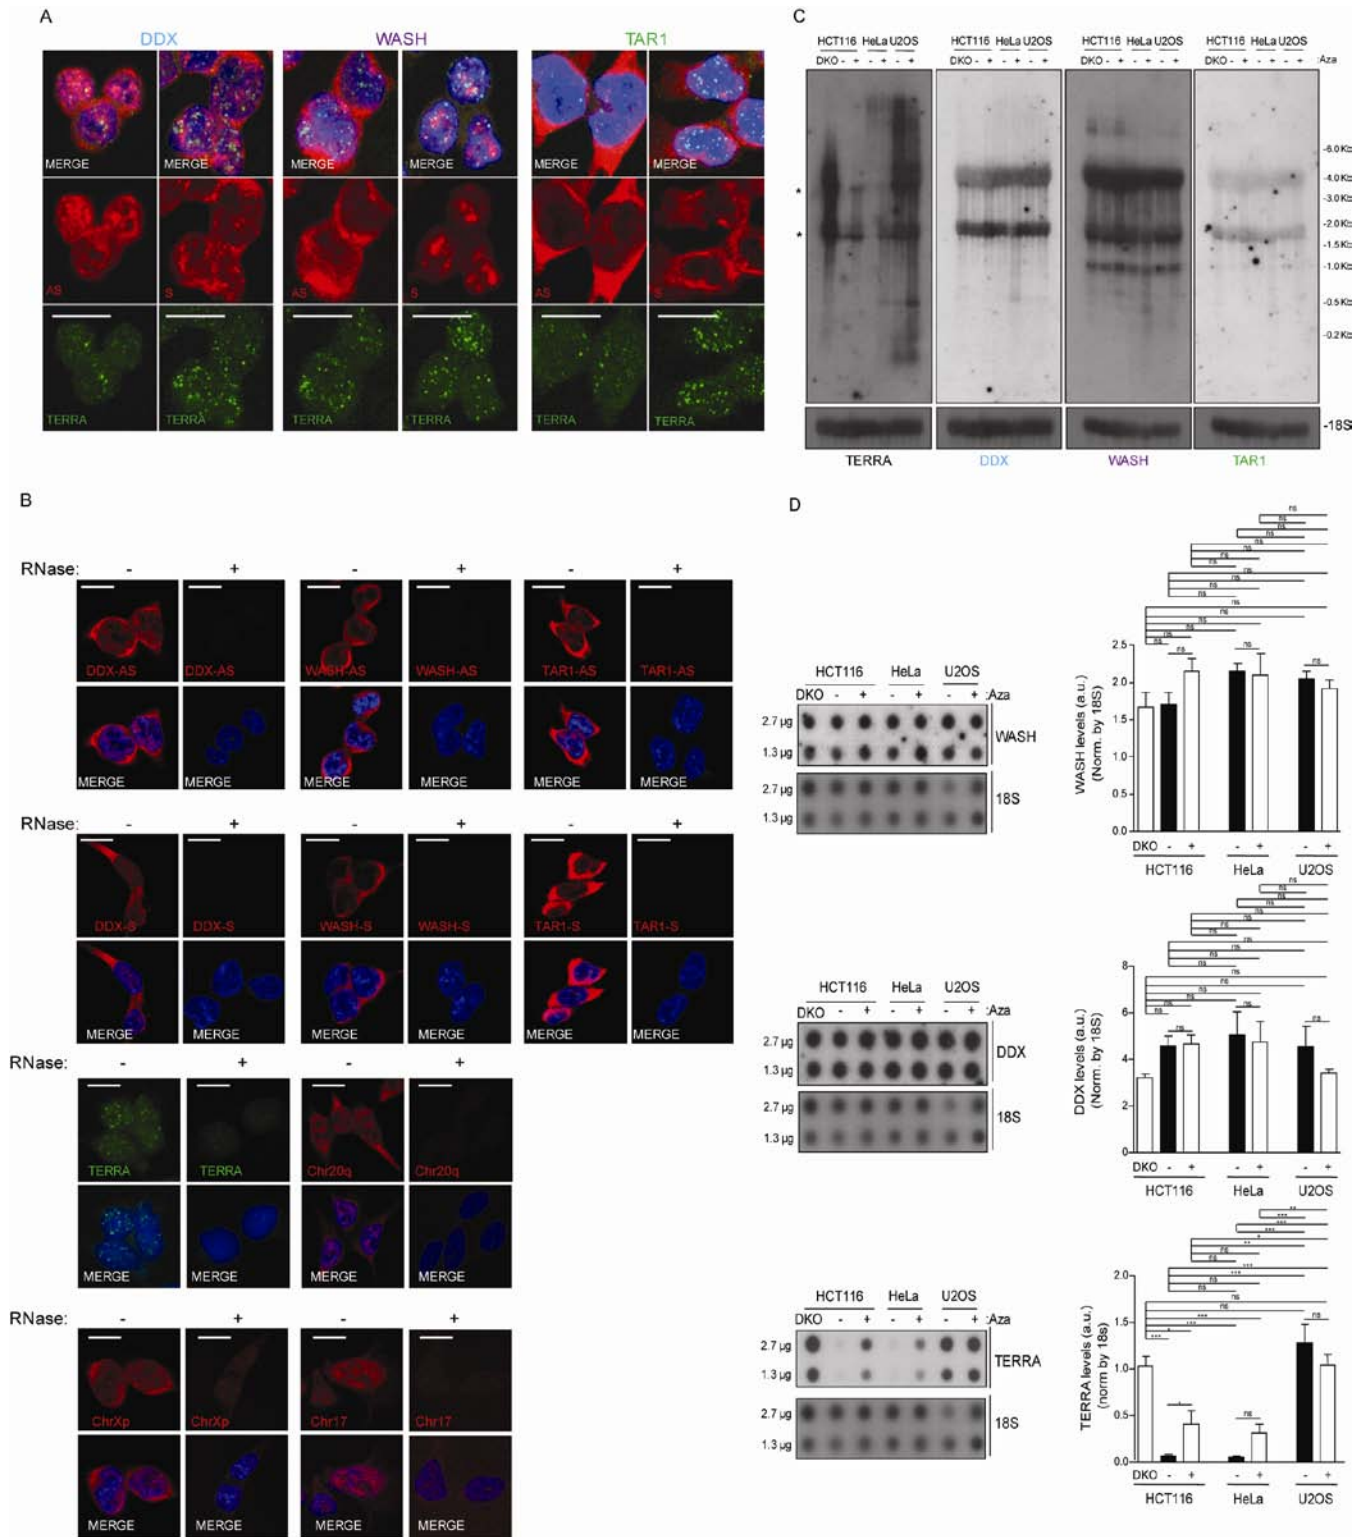

Montero et al\_Supplementary Figure 1

**Supplementary Figure 1. Transcripts arising from the structurally conserved subtelomeres do not show TERRA features.** **(A)** Confocal microscopy images of double RNA-FISH using probes targeting either TAR1, DDX11L or WASH transcripts (red) and TERRA-UUAGGG track (green). At least 50 nuclei were analyzed in all the cases. AS: probe complementary to the transcript arising from the positive DNA strand; S: probe complementary to the transcript from the negative DNA strand. Scale bar: 10  $\mu$ m. **(B)** Confocal microscopy images from RNA-FISH with the different RNA-FISH probes in the absence or presence of RNase. Scale bar: 10  $\mu$ m. **(C)** Northern blotting using  $^{32}$ P-dCTP-labelled probes on total RNA from HCT116 cells DKO (for the DNMT1 and 3b genes) or HCT116 wild-type, HeLa and U2OS treated and untreated with 5Azacytidin (Aza) for 72 hours. The RNA was used to prepare two identical membranes, in one of them the TERRA probe was hybridized first and, upon stripping, the WASH probe. In the other membrane, the DDX probe was hybridized first and then the TAR1 probe. 18S was included as a loading control. The expected size for DDX transcripts is 1.4-1.6kb and for WASH 1.3-1.8Kb. For TAR1 region, no annotated transcripts have been described so far. \*Unspecific band due to cross-hybridization with rRNA 18S and 28S. **(D)** The RNA extracted in (B) was also used for RNA dot-blot to detect either TERRA-UUAGGG track, DDX11L or WASH transcripts; 18S serves as loading control. All the hybridizations were performed on the same membrane one after the other upon stripping. (Graphs) Dot-blot quantification normalized by 18S (mean values $\pm$ s.e.m., n=3 biological replicates). The Student's t-test was used for the statistical analysis of the comparison between untreated and Aza-treated cells. One-way Anova with Tukey post test was used for the statistical analysis of the comparison of one cell line with the others (\* $p < 0.05$ , \*\* $p < 0.01$  and \*\*\* $p < 0.001$ ).

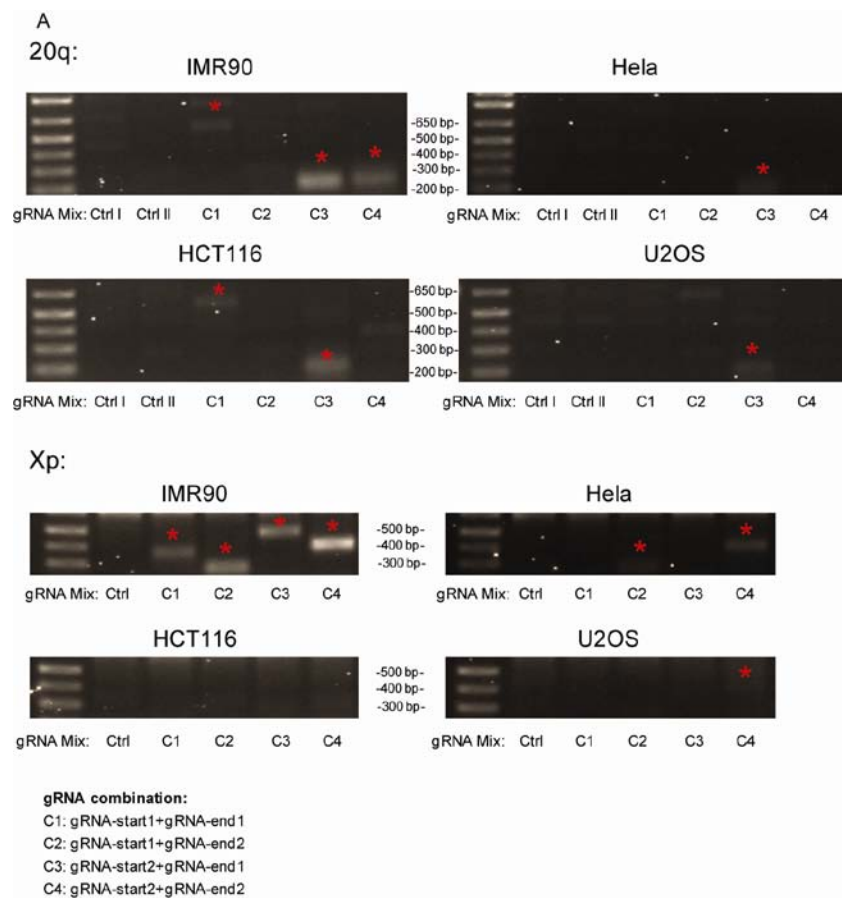

**Supplementary Figure 2. Different combinations of gRNAs are able to delete the 20q and Xp loci in different cell lines.** IMR90 non-transformed human fibroblasts, HeLa, HCT166 and U2OS cell lines were transfected with different combinations of Cas9-GFP-plasmids containing two different gRNAs to delete 10Kb of the 20q and XpYp region enriched in TERRA transcripts. Two-days upon transfection total DNA was isolated from the different cells lines and PCR using specific primers to detect the deletion was performed and visualized in ethidium bromide gels. The individual gRNAs used in each combination (C1, C2, C3 and C4) (gRNA mix) are shown below. The primers for the gRNAs synthesis can be found in the **Supplementary Table 5**. In both cases control PCRs (Ctrl I and Ctrl II) using DNA for non treated cells are shown. \* DNA amplification found in the treated cells PCR but not in the control PCR.

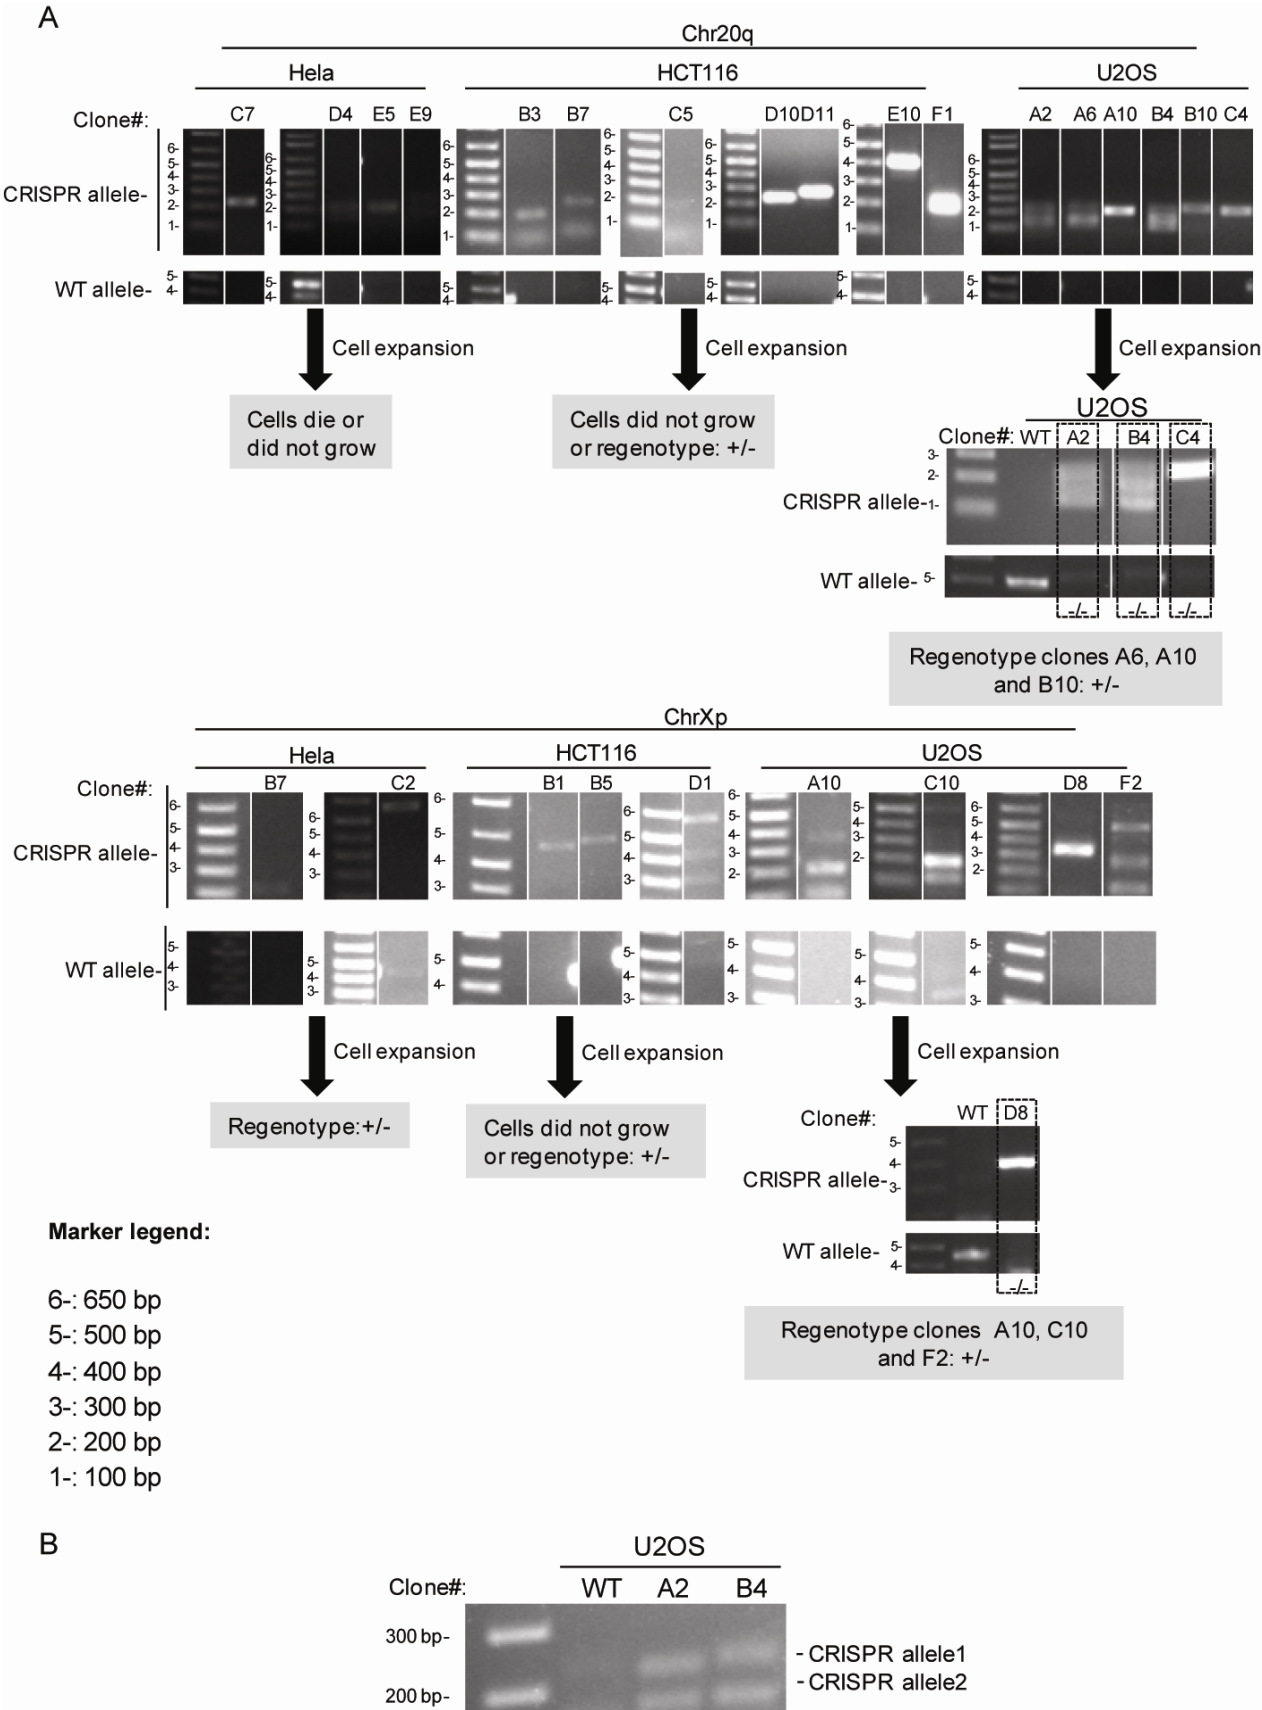

Montero et al\_Supplementary Figure 3

**Supplementary Figure 3. Regenotyping of false homozygous clones upon expansion.**

**(A)** Ethidium bromide gels showing the genotype for the CRISPR and wild-type allele in the different clones of the HeLa, HCT116 and U2OS cells obtained upon the deletion of the 20q and Xp loci before and after expansion. The primers to detect the deletion were designed to obtain a PCR product of 219 bp for the 20q deletion and of 407bp for the Xp deletion but other sizes can be expected depending on how the CRISPR cut&repair was performed by the cell. The DNA marker legend is shown at the left bottom. Ethidium bromide gels with different expositions are due to the run of the different samples on different days. The white strips in the gels indicate the removal of irrelevant samples from that gel **(B)** Ethidium bromide gels showing the two different CRISPR alleles in the 20q-KO clones A2 and B4

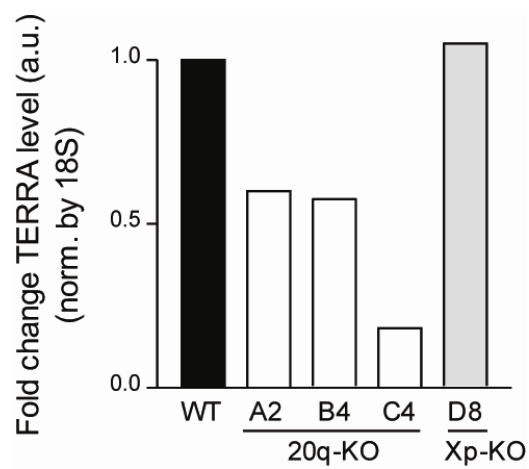

**Supplementary Figure 4. Total TERRA levels upon deletion of the 20q locus.**

Quantification of TERRA signal obtained in the Northern blot from Fig. 3B normalized by 18S.

Fold change is shown

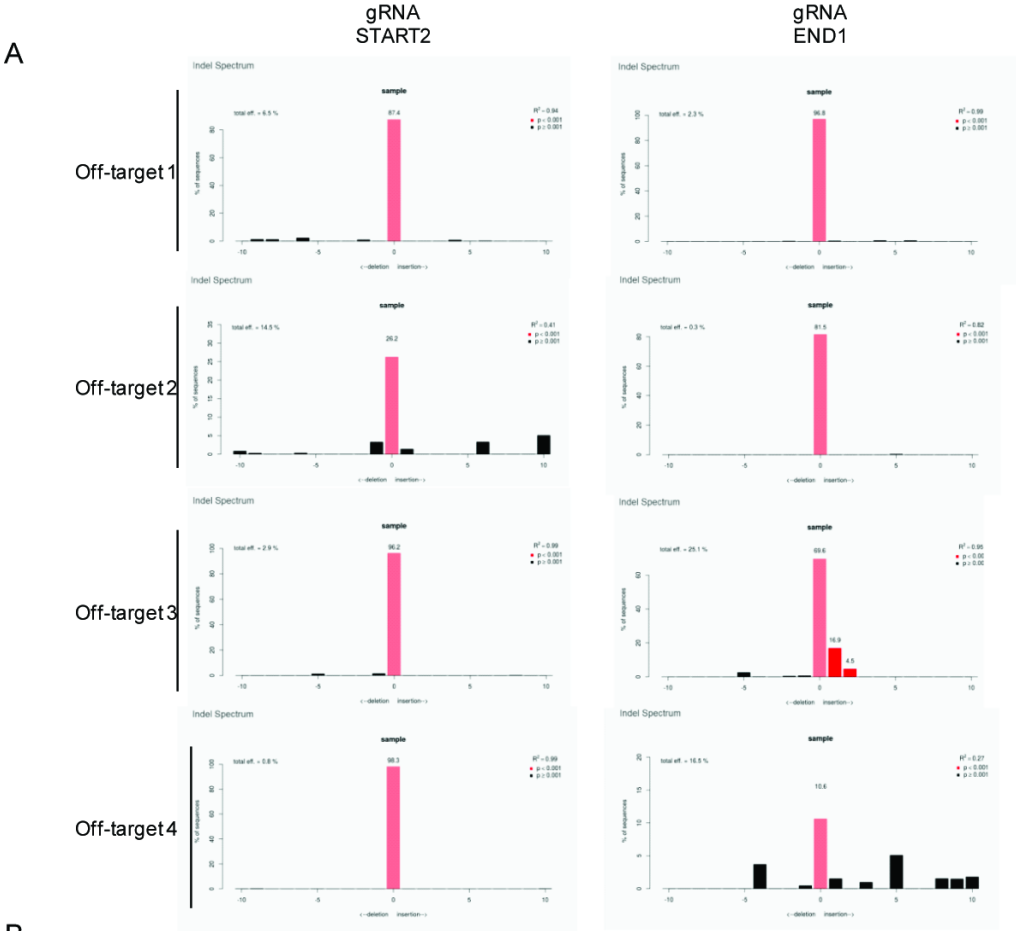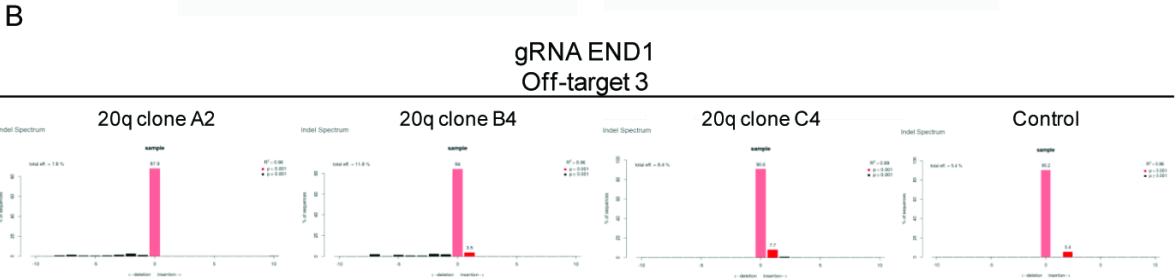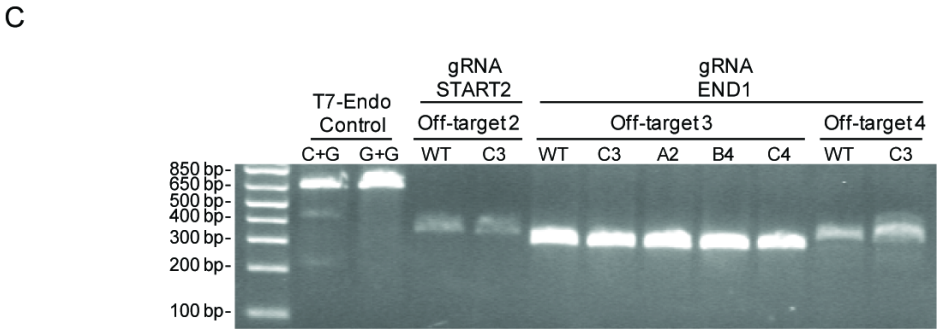

Montero et al.\_Supplementary Figure 5

**Supplementary Figure 5. Off-target mutation analysis in the 20q-TERRA KO cells. (A)**

TIDE (Tracking of Indels by DEcomposition) analysis to study the four top of targets for the gRNAs (START2 and END1) used to generate the 20q locus deletion. The analysis was performed with DNA pools from either wild type cells or cells bearing the 20q deletion, named C3 (from which the clones A2, B4 and C4 were obtained from). A DNA that did not undergo CRISPR treatment was used as reference. **(B)** TIDE analysis for the off-targets 3, gRNA END1 using DNAs from the 20q-KO clones A2, B4 and C4 and from cells that did not undergo CRISPR treatment. A DNA from other set of cells that did not undergo CRISPR treatment was used as reference **(C)** T7 endonuclease assay was performed on DNAs from the regions of interest (off-target2/START2, off-target 3/END1 and off-target 4/END1) obtained from pool of cells bearing the 20q deletion (C3) or from the 20q-KO clones. Two identical DNAs except for a C to G mutation in one of them (named C and G) were used as positive control. The ethidium bromide gels shows the different DNAs upon T7 endonuclease digestion.



A

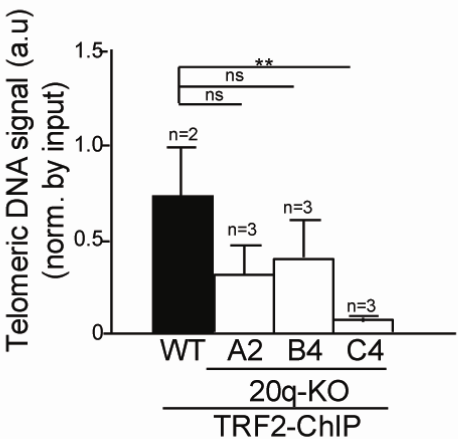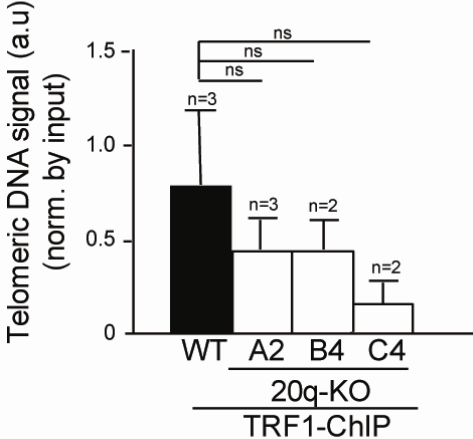

B

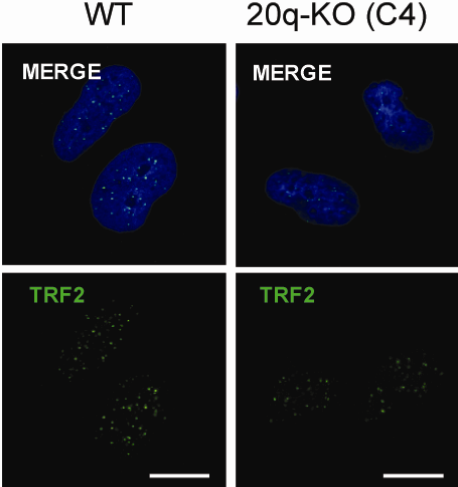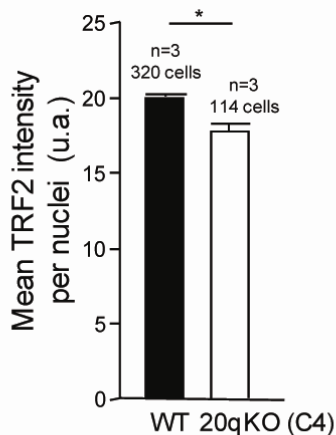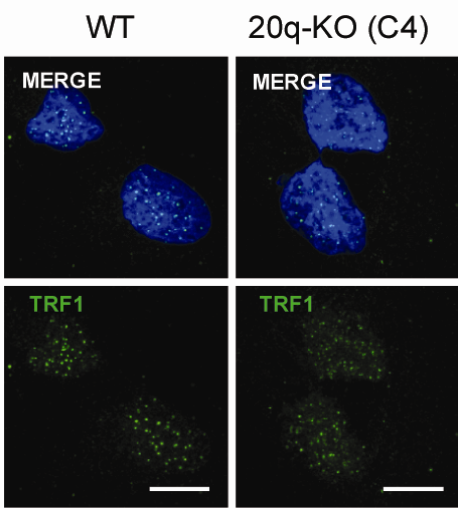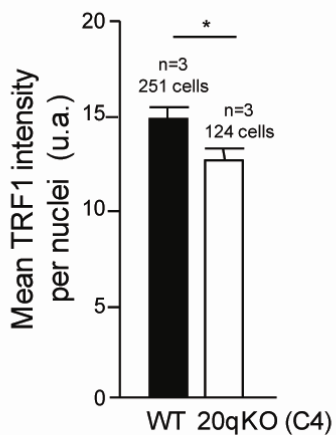

Montero et al.\_Supplementary Figure 6

**Supplementary Figure 6 Detection of shelterins in 20q-TERRA KO cells. (A)**

Quantification of immunoprecipitated telomeric repeats upon TRF2- or TRF1-ChIP. Values were obtained after normalization to telomeric DNA input and corrected by the differences in the telomere length between the clones and wild-type cells (see Figure 4). Error bars correspond to the 2-3 independent experiments (mean values  $\pm$  s.e.m., n=2-3 independent experiments). One-way Anova with Tukey post test was used for statistical analysis (\*\* $p < 0.01$ ). **(B)** Representative images of TRF2 and TRF1 immunofluorescence (green) in wild-type cells and 20q-KO TERRA cells (clone C4). Merge images with DAPI are also shown (Graphs). Quantification of the mean fluorescence intensity of TRF1 and TRF2 is represented (mean values  $\pm$  s.e.m., n=3 independent experiments). The Student's t-test was used for statistical analysis (\* $p < 0.05$ ). Scale bar: 10  $\mu$ m.

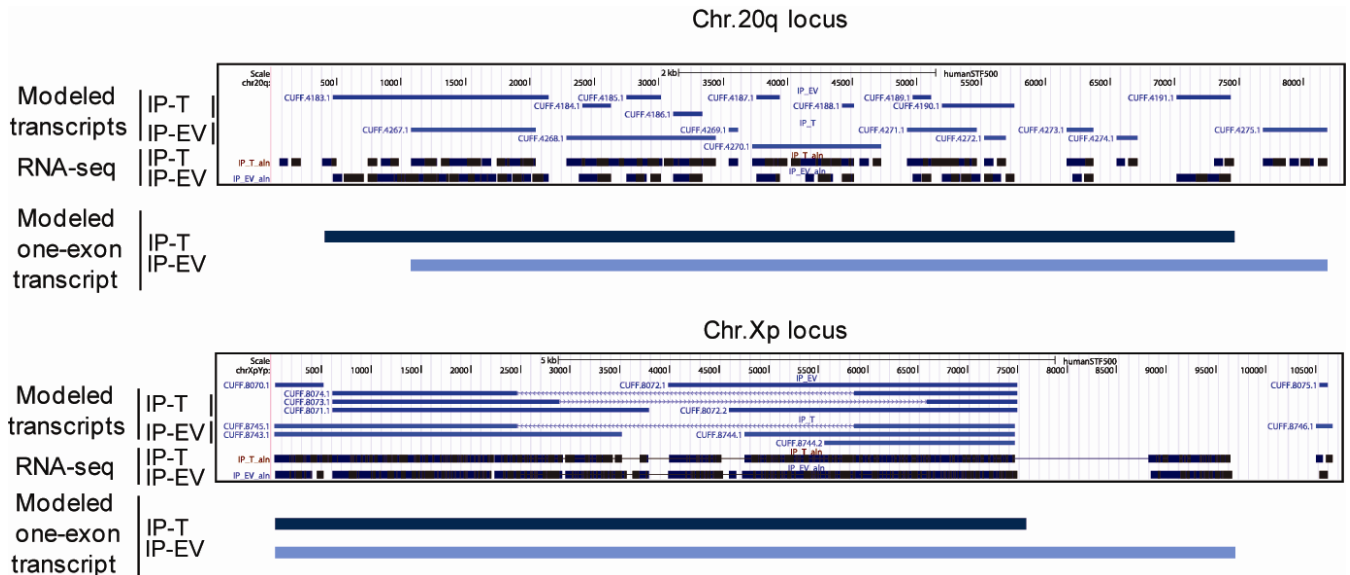

**Supplementary Figure 7. Comparison of 20q-TERRA transcripts with Xp-RNAs.** Raw data from RNA-seq samples (IP-EV and IP-T)<sup>1</sup> was downloaded and aligned to the human subtelomeric reference genome. Next, transcripts were modeled by Cufflinks in the chr.20q and chr.Xp subtelomeric regions of interest (corresponding to the regions to be deleted with CRISPR/Cas9) and pairwise alignments performed (see Materials and Methods). The snapshot shows (from top to bottom) modeled transcripts in the different IPs, RNA-seq reads (dense format) and the modeled one-exon transcript for each condition

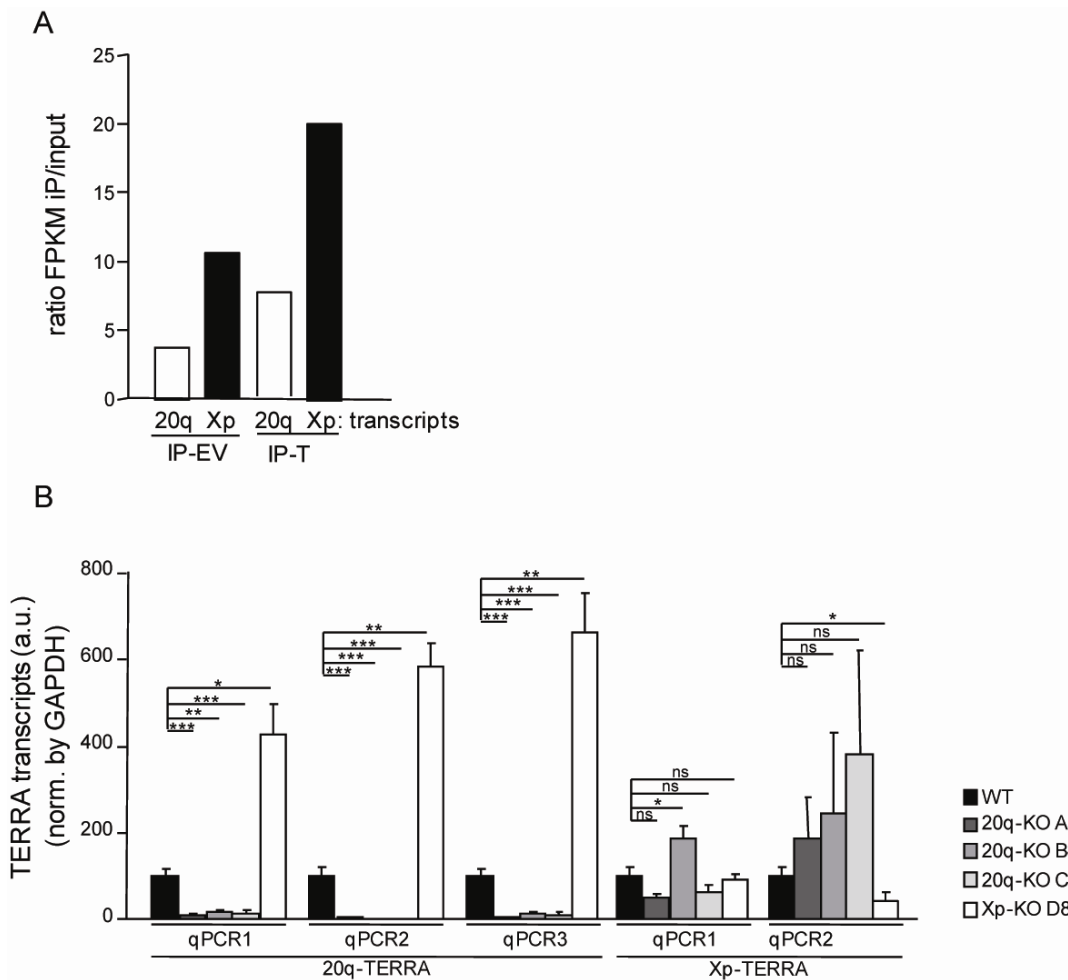

**Supplementary Figure 8. Expression analysis of the 20q-TERRA transcripts with respect to the Xp-RNAs.** **(A)** Raw data from RNA-seq samples (IP-EV and IP-T) (Porro et al., 2014) was downloaded and aligned to the human subtelomeric reference genome. FPKM (fragments per kilobase of transcript per million fragments mapped) in the chr.20q and chr.Xp subtelomeric regions of interest (corresponding to the regions to be deleted with CRISPR/Cas9) were calculated for each of the IPs and input. (Graph). Quantification of the FPKM in each IP normalized by their corresponding input. **(B)** Detection of the 20q-TERRA or Xp transcripts by PCR using different pair of primers in wild-type cells, 20q-KO clones (A2, B4, C4) and Xp-KO clone (D8). The fold RNA enrichment normalized by GAPDH is shown. Primers 20q/qPCR1-3 are designed within the 20q TERRA locus. Primer Xp/qPCR 1 and 2 are designed within the Xp locus but only the Xp/qPCR2 is designed within the Xp deletion performed in clone D8.

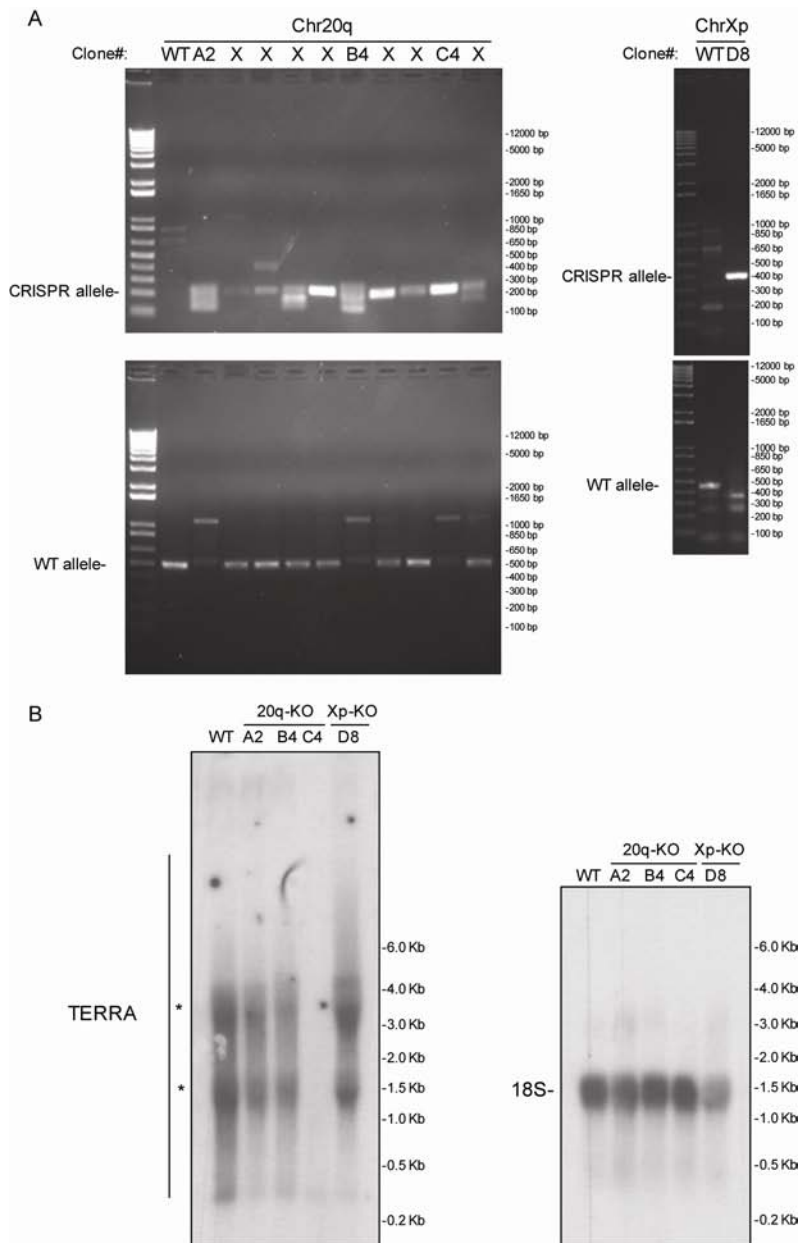

**Supplementary Figure 9. Raw gels and blots from Figure 2E and 3B. (A)** Ethidium bromide gels showing the CRISPR allele for the deletion of the 20q and Xp loci detected by PCR in different clones of the U2OS cells. The white strips in the gels indicate the removal of irrelevant samples from that gel. 'X' are irrelevant samples. **(B)** Northern blotting using  $^{32}\text{P}$ -dCTP-labelled probe against TERRA-UUAGGG tract in the U2OS cells WT or KO for the 20q or Xp loci. 18S was included as a loading control. \*Unspecific band due to cross-hybridization with rRNA 18S and 28S.

## Supplementary Tables

### Supplementary Table 1. Chromosome ends amplified by probes against TAR1, DDX and WASH

| Probe | Amplified region          |
|-------|---------------------------|
| TAR1  | 1q,2q,4q,10q,21q,22q      |
| DDX   | 1p,2,9p,12p,15q,16p,Xq,Yq |
| WASH  | 1p,9p,12p,Xq,Yq           |

### Supplementary Table 2. TAR1 probe specificity recognizing different chromosome ends

|        | Max score | Total score | Query cove | E value   | Ident | Probe origin |
|--------|-----------|-------------|------------|-----------|-------|--------------|
| Chr1q  | 697       | 697         | 1%         | 0         | 100%  | 1q           |
| Chr2q  | 697       | 697         | 1%         | 0         | 100%  | 2q,4q        |
| Chr5q  | 675       | 675         | 1%         | 0         | 99%   | 2q,4q        |
| Chr6q  | 675       | 675         | 1%         | 0         | 99%   | 10q          |
| Chr9p  | 481       | 481         | 1%         | 1.00E-138 | 90%   | 10q          |
| Chr10q | 697       | 697         | 1%         | 0         | 100%  | 10q          |
| Chr13q | 664       | 664         | 1%         | 0         | 98%   | 10q          |
| Chr15q | 464       | 464         | 1%         | 1.00E-133 | 89%   | 10q          |
| Chr16p | 523       | 523         | 1%         | 2.00E-151 | 92%   | 10q          |
| Chr22q | 697       | 697         | 1%         | 0         | 100%  | 22q          |
| ChrXq  | 483       | 483         | 1%         | 4.00E-139 | 90%   | 10q          |

### Supplementary Table 3. DDX probe specificity recognizing different chromosome ends

|        | Max score | Total score | Query cove | E value | Ident | Probe origin |
|--------|-----------|-------------|------------|---------|-------|--------------|
| Chr1p  | 710       | 710         | 1%         | 0       | 100%  | 1p           |
| Chr9p  | 710       | 710         | 1%         | 0       | 100%  | 9p,Xq,Yq     |
| Chr12p | 710       | 710         | 1%         | 0       | 100%  | 12p          |
| Chr15q | 710       | 710         | 1%         | 0       | 100%  | 15q          |
| Chr16p | 710       | 710         | 1%         | 0       | 100%  | 16p          |
| Chr19p | 706       | 706         | 1%         | 0       | 100%  | 1p           |
| ChrXq  | 710       | 710         | 1%         | 0       | 100%  | 9p,Xq,Yq     |

### Supplementary Table 4. WASH probe specificity recognizing different chromosome ends

|       | Max score | Total score | Query cove | E value | Ident | Probe origin |
|-------|-----------|-------------|------------|---------|-------|--------------|
| Chr1p | 701       | 701         | 1%         | 0       | 100%  | 1p           |
| Chr9p | 697       | 697         | 1%         | 0       | 100%  | 9p           |

|        |     |     |    |   |      |       |
|--------|-----|-----|----|---|------|-------|
| Chr12p | 701 | 701 | 1% | 0 | 100% | 12p   |
| Chr15q | 682 | 682 | 1% | 0 | 99%  | 1p    |
| Chr16p | 645 | 645 | 1% | 0 | 98%  | 1p    |
| Chr19p | 676 | 676 | 1% | 0 | 99%  | 1p    |
| ChrXq  | 701 | 701 | 1% | 0 | 100% | Xq,Yq |

### Supplementary Table 5. Primers for gRNA cloning

| Region  | Primer            | Sequence (5'-3')           |
|---------|-------------------|----------------------------|
| Chr20q  | gRNA20q-start1    | CACCgTATAGCGGGCGGCACGCCGCC |
|         | R-gRNA20q-start1  | AAACGGCGGGCGTGCCGCCGCTATAc |
|         | gRNA20q-start2    | CACCgCAGGCTGGCGCGACGTGCGG  |
|         | R-gRNA20q-start2  | AAACCCGCACGTCGCGCCAGCCTGc  |
|         | gRNA20q-end1      | CACCgCCCACCACCTTAGCGGATCA  |
|         | R-gRNA20q-end1    | AAACTGATCCGCTAAGGTGGTGGGc  |
|         | gRNA20q-end2      | CACCgAAATTTTACTTCATCGGAGG  |
|         | R-gRNA20q-end2    | AAACCCTCCGATGAAGTAAAATTTc  |
| ChrXpYp | gRNAXpYp-start1   | CACCgCATGGTGGGACCCGATGCT   |
|         | R-gRNAXpYp-start1 | AAACAGCATCGGGTCCCCACCATGc  |
|         | gRNAXpYp-start2   | CACCGCCACCATATCATACTCGGA   |
|         | R-gRNAXpYp-start2 | AAACTCCGAGTATGATATGGTGGC   |
|         | gRNAXpYp-end1     | CACCgAACCGGGTGGGTACGTCAAC  |
|         | R-gRNAXpYp-end1   | AAACGTTGACGTACCCACCCGGTTc  |
|         | gRNAXpYp-end2     | CACCGGTCTACACCGGCTTCATCC   |
|         | R-gRNAXpYp-end2   | AAACGGATGAAGCCGGTGTAGACC   |

### Supplementary Table 6. gRNA combinations

Combination#1: gRNA-start1+gRNA-end1

Combination #2: gRNA-start1+gRNA-end2

Combination #3: gRNA-start2+gRNA-end1

Combination #4: gRNA-start2+gRNA-end2

### Supplementary Table 7. Primers used to amplify the KO allele

| gRNA combination | Primer   | Sequence (5'-3')       |
|------------------|----------|------------------------|
| #1,#2,#3,#4      | F-20qKOI | CCCGGGTCTGTGTTAAGC     |
| #1,#3            | R-20qKOI | GATCAGGGCTGTCTTAATGC   |
| #2,#4            | R-0qKOII | TCATCACACCTGCATATACTGT |
| #1,#2,#3,#4      | F-pYpKO  | GGCAAAGGGAGCAGTCAT     |
| #1,#2,#3,#4      | R-pYpKO  | GACGCAACTTCACAGTTACA   |

**Supplementary Table 8. Primers to detect transcripts from the 20q and Xp loci**

| Region | Primer     | Sequence (5'-3')         |
|--------|------------|--------------------------|
| 20q    | F120q-qpcr | CTGGTGCCAGAGTGGATT       |
|        | R120q-qpcr | CACCTGTTCTCTTTGTCTGG     |
|        | F220q-qpcr | ACATGGGCGATACTCAGG       |
|        | R220q-qpcr | CCCACTACTGTGCCTCAA       |
|        | F320q-qpcr | GAAGTTGCTGGGTTCTATGG     |
|        | R320q-qpcr | ATGGTGCAGACACTGTGG       |
| Xp     | F1xp-qpcr  | GCAAAGAGTGAAAGAACGAAGCTT |
|        | R1xp-qpcr  | CCCTCTGAAAGTGGACCTATCA   |
|        | F2xp-qpcr  | CTTGAGCTCTCACCACTCAC     |
|        | R2xp-qpcr  | GCCACGATAGCTTCTTCC       |

**Supplementary Table 9. Chromosomal rearrangements found by CGH array**

| Chr   | Cytoband        | Start       | Stop        | Gain      | Loss      | Deletion   | pval       |
|-------|-----------------|-------------|-------------|-----------|-----------|------------|------------|
| chr3  | p26.3 - p26.1   | 212.711     | 6.063.107   | 0,000000  | -0,495877 | 0,000000   | 6.11E-97   |
| chr4  | q24 - q28.1     | 102.668.388 | 126.615.872 | 0,000000  | -0,273520 | 0,000000   | 7.73E-09   |
| chr6  | p25.3 - p12.3   | 407.231     | 51.356.459  | 0,000000  | -0,540169 | 0,000000   | 4,900e-324 |
| chr6  | p25.3 - p22.2   | 439.115     | 26.104.535  | 0,000000  | -0,775369 | 0,000000   | 1.51E-80   |
| chr6  | p25.3 - p24.3   | 685.345     | 9.826.230   | 0,000000  | -0,907387 | 0,000000   | 5.65E-07   |
| chr6  | p22.1 - p12.3   | 27.049.061  | 49.895.377  | 0,000000  | -0,417303 | 0,000000   | 6.61E-42   |
| chr6  | q27             | 166.907.999 | 170.890.108 | 0,365987  | 0,000000  | 0,000000   | 1.07E-43   |
| chr7  | p22.3 - p21.3   | 707.018     | 12.258.124  | 0,313862  | 0,000000  | 0,000000   | 3.10E-92   |
| chr7  | p21.3           | 8.153.319   | 12.193.158  | 0,506460  | 0,000000  | 0,000000   | 5.47E-08   |
| chr9  | p24.3           | 329.684     | 1.411.809   | 0,000000  | -0,866823 | 0,000000   | 1.43E-42   |
| chr9  | p24.3 - p21.3   | 1.869.792   | 23.690.332  | 0,778509  | 0,000000  | 0,000000   | 4,900e-324 |
| chr9  | p24.3 - p24.2   | 1.869.792   | 4.357.696   | 0,517094  | 0,000000  | 0,000000   | 9.67E-11   |
| chr9  | p24.2 - p23     | 4.516.000   | 11.573.590  | 1,181,035 | 0,000000  | 0,000000   | 1.82E-62   |
| chr9  | p22.1 - p21.3   | 18.838.925  | 23.660.030  | 0,502066  | 0,000000  | 0,000000   | 5.72E-29   |
| chr10 | p15.2 - p15.1   | 3.735.020   | 4.133.505   | 0,000000  | 0,000000  | -1,917,017 | 1.37E-27   |
| chr10 | q11.21 - q24.1  | 44.877.427  | 97.315.278  | 0,000000  | -0,359404 | 0,000000   | 4,900e-324 |
| chr10 | q23.1 - q23.33  | 84.298.588  | 96.872.423  | 0,000000  | -0,474244 | 0,000000   | 2.15E-11   |
| chr12 | p11.22 - p11.1  | 29.329.809  | 34.345.585  | 0,000000  | -0,401302 | 0,000000   | 1.07E-61   |
| chr12 | p11.1           | 33.636.657  | 34.345.585  | 0,000000  | 0,000000  | -1,189,862 | 1.05E-23   |
| chr14 | q11.2 - q24.3   | 20.253.739  | 78.177.244  | 0,308504  | 0,000000  | 0,000000   | 4,900e-324 |
| chr14 | q11.2 - q21.2   | 21.697.792  | 45.083.729  | 0,411750  | 0,000000  | 0,000000   | 1.20E-17   |
| chr15 | q12 - q13.1     | 27.571.940  | 28.525.460  | 0,000000  | -0,334935 | 0,000000   | 1.24E-09   |
| chr15 | q14 - q26.3     | 38.466.370  | 98.966.441  | 0,000000  | -0,461232 | 0,000000   | 4,900e-324 |
| chr15 | q14 - q22.2     | 39.979.988  | 60.823.012  | 0,000000  | -0,284430 | 0,000000   | 4.02E-65   |
| chr15 | q23 - q26.2     | 71.272.476  | 96.982.260  | 0,000000  | -0,642954 | 0,000000   | 7.53E-74   |
| chr15 | q23 - q24.2     | 72.670.081  | 75.224.254  | 0,000000  | -0,877269 | 0,000000   | 3.38E-12   |
| chr18 | p11.32 - p11.21 | 142.096     | 13.971.521  | 0,000000  | -0,571498 | 0,000000   | 4,900e-324 |



|       |                |            |            |          |           |            |            |
|-------|----------------|------------|------------|----------|-----------|------------|------------|
| chr18 | p11.32         | 142.096    | 293.595    | 0,000000 | 0,000000  | -1,636,014 | 1.97E-13   |
| chr18 | p11.31 - 11.23 | 3.954.575  | 8.055.875  | 0,000000 | -0,786816 | 0,000000   | 1.40E-11   |
| chr18 | p11.21         | 11.286.577 | 13.885.315 | 0,000000 | -0,362484 | 0,000000   | 9.21E-10   |
| chr19 | p13.3          | 5.843.077  | 6.851.877  | 0,412088 | 0,000000  | 0,000000   | 5.38E-32   |
| chr19 | q11 - q13.11   | 28.272.497 | 33.976.688 | 0,000000 | -0,490308 | 0,000000   | 1.60E-109  |
| chr21 | p11.2          | 9.832.936  | 9.834.682  | 0,000000 | -0,721174 | 0,000000   | 1.30E-36   |
| chr21 | q11.2 - q22.13 | 14.640.392 | 38.608.514 | 0,000000 | -0,533194 | 0,000000   | 4,900e-324 |
| chr21 | q22.11 - 22.13 | 35.210.724 | 38.608.514 | 0,000000 | -0,811744 | 0,000000   | 1.04E-19   |

**Supplementary Table 10. Percentage of identity between the different modeled transcripts in the 20q and Xp loci. IP-EV: IP-sh scramble; IP-T: IP-shTRF2<sup>1</sup>**

|                    |               | Chr.20q transcripts |        |        |        |        |        |        |        |        |        |
|--------------------|---------------|---------------------|--------|--------|--------|--------|--------|--------|--------|--------|--------|
|                    |               | IP-T                | 4267.1 | 4268.1 | 4269.1 | 4270.1 | 4271.1 | 4272.1 | 4273.1 | 4274.1 | 4275.1 |
| Chr.Xp transcripts | <b>8745.1</b> | 39.3                | 39.1   | 53.9   | 46.3   | 50.9   | 36.3   | 45.1   | 46.9   | 37.9   |        |
|                    | <b>8743.1</b> | 37.4                | 41.2   | 58.6   | 38.2   | 36     | 47.2   | 44.2   | 41.2   | 40.3   |        |
|                    | <b>8744.1</b> | 40.1                | 36.4   | 55.9   | 35.1   | 30.4   | 35.5   | 35.8   | 42.1   | 33.7   |        |
|                    | <b>8744.2</b> | 37.4                | 36.4   | 55.9   | 45.2   | 45.4   | 35.5   | 35.8   | 42.1   | 39.5   |        |
|                    | <b>8746.1</b> | 41.4                | 39.8   | 38.2   | 42.5   | 49.8   | 38.6   | 42.4   | 50.3   | 39.1   |        |

|                    |               | Chr.20q transcripts |        |        |        |        |        |        |        |        |        |
|--------------------|---------------|---------------------|--------|--------|--------|--------|--------|--------|--------|--------|--------|
|                    |               | IP-EV               | 4183.1 | 4184.1 | 4185.1 | 4186.1 | 4187.1 | 4188.1 | 4189.1 | 4190.1 | 4191.1 |
| Chr.Xp transcripts | <b>8070.1</b> | 40.9                | 48.9   | 39     | 42.2   | 38.6   | 41.4   | 41.8   | 43.8   | 40.7   |        |
|                    | <b>8074.1</b> | 36.5                | 41.4   | 40.4   | 37.1   | 43.2   | 82     | 42.3   | 52.8   | 39     |        |
|                    | <b>8073.1</b> | 37                  | 38.4   | 44.5   | 36.1   | 42.6   | 71.6   | 45.1   | 34.4   | 45     |        |
|                    | <b>8071.1</b> | 43.5                | 38.4   | 44.5   | 36.1   | 42.6   | 50.8   | 39.7   | 43.5   | 45     |        |
|                    | <b>8072.1</b> | 37                  | 47.8   | 40     | 38.2   | 43.1   | 71.6   | 45.1   | 34.4   | 38.4   |        |
|                    | <b>8072.2</b> | 38.6                | 47.8   | 40     | 38.2   | 43.1   | 71.6   | 45.1   | 34.4   | 38.4   |        |
|                    | <b>8075.1</b> | 32.8                | 51.1   | 37.2   | 48     | 54.8   | 42.4   | 46.6   | 41.6   | 38.2   |        |

**Supplementary Table 11. Percentage of identity, size (bp) and presence of DNA repeats in the 20q-modeled transcripts with more than 50% homology with the Xp-modeled transcripts. IP-EV: IP-sh scramble; IP-T: IP-shTRF2<sup>1</sup>**

|      | 20q RNAs | %Homology with Xp | Transcript size | Repeats   |
|------|----------|-------------------|-----------------|-----------|
| IP-T | 4269.1   | 53-55%            | 72 bp           | LTR       |
|      | 4271.1   | 50%               | 546 bp          | SINE/LINE |
|      | 4274.1   | 50%               | 167 bp          | -         |

|       |        |        |        |           |
|-------|--------|--------|--------|-----------|
| IP-EV | 4188.1 | 82-71% | 90 bp  | SINE/LINE |
|       | 4187.1 | 54%    | 185 bp | LTR       |
|       | 4184.1 | 51%    | 219 bp | LINE/LTR  |

**Supplementary Table 12. Percentage of Identity between the one-exon modeled transcript from the 20q and Xp loci. IP-EV: IP-sh scramble; IP-T: IP-shTRF2<sup>1</sup>**

|       | 20q-RNAs vs Xp-RNAs |
|-------|---------------------|
| IP-EV | 37.70%              |
| IP-T  | 39.20%              |

**Supplementary Table 13. Primers for RNA-FISH and Northern blot probes**

| Region  | Primer           | Sequence (5'-3')                                      |
|---------|------------------|-------------------------------------------------------|
| TAR1    | F-ProbeTAR1      | GCAGAGTTCTTCTCAGGTCA                                  |
|         | R-ProbeTAR1      | TGTCATGTGTGCATTAGGAA                                  |
|         | F-T7ProbeTAR1    | ccaagcttctaatacgactcactatagggagaGCAGAGTTCTTCTCAGGTCA  |
|         | R-T7ProbeTAR1    | ccaagcttctaatacgactcactatagggagaTGTCATGTGTGCATTAGGAA  |
| DDX11L  | F-ProbeDDX11L    | TGTGTGGAAGTTCACTCCTG                                  |
|         | R-ProbeDDX11L    | CAGGATGGAAGACAGATTGG                                  |
|         | F-T7ProbeDDX11L  | ccaagcttctaatacgactcactatagggagaTGTGTGGAAGTTCACTCCTG  |
|         | R-T7ProbeDDX11L  | ccaagcttctaatacgactcactatagggagaCAGGATGGAAGACAGATTGG  |
| WASH    | F-ProbeWASH      | GCCTCTTAAGAACACAGTGG                                  |
|         | R-ProbeWASH      | ATCTCTGGGAAAGGACCTG                                   |
|         | F-T7ProbeWASH    | ccaagcttctaatacgactcactatagggagaGCCTCTTAAGAACACAGTGG  |
|         | R-T7ProbeWASH    | ccaagcttctaatacgactcactatagggagaATCTCTGGGAAAGGACCTG   |
| Chr20q  | F-ProbeChr20q    | CATTGCTGGTGAAGACAG                                    |
|         | R-ProbeChr20q    | GGACCCTCTGTAACAAATGAC                                 |
|         | F-T7ProbeChr20q  | ccaagcttctaatacgactcactatagggagaCATTGCTGGTGAAGACAG    |
|         | R-T7ProbeChr20q  | ccaagcttctaatacgactcactatagggagaGGACCCTCTGTAACAAATGAC |
| ChrXpYp | F-ProbeChrXpYp   | AACCTGCCGTATCTCACC                                    |
|         | R-ProbeChrXpYp   | ACACTCCTGTAGTCCCACCT                                  |
|         | F-T7ProbeChrXpYp | ccaagcttctaatacgactcactatagggagaAACCTGCCGTATCTCACC    |
|         | R-T7ProbeChrXpYp | ccaagcttctaatacgactcactatagggagaACACTCCTGTAGTCCCACCT  |

**Supplementary Table 14. Primers for promoter region cloning**

| Region | Primer  | Sequence (5'-3')               |
|--------|---------|--------------------------------|
| 20qPr1 | F-0qPr1 | CGCGGTACCAAGCCTAAGTGTGGCAAGTC  |
|        | R-0qPr1 | CCCCTCGAGCAAGGTGTGTGCTGAGAAAG  |
| 20qPr2 | F-0qPr2 | CGCGGTACCGGAATCATGAAGTATGTGACC |

|        |         |                                  |
|--------|---------|----------------------------------|
|        | R-0qPr2 | CCCGCTCGAGGGCCTAGTATCCGGAATATACA |
| 20qPr3 | F-0qPr3 | CGCGGTACCTGTGCGTGTTTCTGTGTC      |
|        | R-0qPr3 | CCCGCTCGAGGTTCAAGGCCCTCCACAG     |
| 20qPr4 | F-0qPr4 | CGCGGTACCGTGGAGTCAGACCACACG      |
|        | R-0qPr4 | CCCGCTCGAGTACCAGAAGCTGGAGAAAGG   |

---

**Supplementary Table 15. Primers for the amplification of DNA regions with predicted off-target mutations**

| <b>gRNA</b> | <b>Primer</b> | <b>Sequence (5'-3')</b> |
|-------------|---------------|-------------------------|
| gRNA Start2 | F-gS2Off1     | TACAAGGTCCGGAGAAGC      |
|             | R-gS2Off1     | GAGCGGAGGAGGGAGGAC      |
|             | F-gS2Off2     | TGAGTACCAAGGGTCACTCT    |
|             | R-gS2Off2     | GGACGGCTGGTTCTCAGG      |
|             | F-gS2Off3     | GGATGATCTGGGAGAAGC      |
|             | R-gS2Off3     | GGGAATCTGCAGGACAAAC     |
|             | F-gS2Off4     | GGGCAGGTAAGGACGTTT      |
|             | R-gS2Off4     | GCTCCTCACTCCCAAATC      |
| gRNA End1   | F-gE1Off1     | CTCTAGTTCATGCAGGATGC    |
|             | R-gE1Off1     | GAGTGAGAAGAGAGCCTTGG    |
|             | F-gE1Off2     | AATCCAGGAGGCAGAGGT      |
|             | R-gE1Off2     | CAGGTCAGGGAGTCAACAAC    |
|             | F-gE1Off3     | TAGGTCACAGAGCAGTAGGG    |
|             | R-gE1Off3     | GTCCCTAAGGCATTTAGCA     |
|             | F-gE1Off4     | TTCCCAACTATTTGCTGAT     |
|             | R-gE1Off4     | GTTCTGCACCTTATAAACCAG   |

**Supplementary References**

1. Porro, A. *et al.* Functional characterization of the TERRA transcriptome at damaged telomeres. *Nat Commun* **5**, 5379 (2014).
